# Supplementary material
Source: publisher site journal article supplement (https://www.dovepress.com/article/610767)
Supplement: Supplementary file 1 [file Supplementary%20eTables-revised.docx]

**Supplementary eTable 1. Sex-stratified odds ratios for allergen sensitization across pandemic phases**

| **Allergen** | **Male** | | | | | | **Female** | | | | | |
| --- | --- | --- | --- | --- | --- | --- | --- | --- | --- | --- | --- | --- |
| **2020–2022 vs 2018–2019** | ***P* value** | **2023–2024 vs 2018–2019** | ***P* value** | **2023–2024 vs 2020–2022** | ***P* value** | **2020–2022 vs 2018–2019** | ***P* value** | **2023–2024 vs 2018–2019** | ***P* value** | **2023–2024 vs 2020–2022** | ***P* value** |
| **HDM** | 1.16 (1.02, 1.31) | .021 | 1.11 (0.97, 1.26) | .125 | 0.96 (0.87, 1.05) | .361 | 1.05 (0.89, 1.23) | .559 | 1.00 (0.85, 1.17) | .968 | 0.95 (0.84, 1.08) | .427 |
| **house dust** | 0.08 (0.03, 0.19) | <.001 | 1.61 (1.06, 2.45) | .027 | 20.95 (9.17, 47.86) | <.001 | NE | NA | 1.11 (0.65, 1.91) | .699 | NE | NA |
| **mulberry** | NE | NA | NE | NA | 2.22 (1.26, 3.90) | .006 | NE | NA | NE | NA | 0.78 (0.32, 1.90) | .578 |
| **cat hair** | 1.82 (1.33, 2.50) | <.001 | 3.05 (2.23, 4.17) | <.001 | 1.67 (1.39, 2.01) | <.001 | 1.56 (1.05, 2.31) | .027 | 2.68 (1.83, 3.92) | <.001 | 1.72 (1.35, 2.18) | <.001 |
| **dog hair** | 7.95 (4.06, 15.56) | <.001 | 19.37 (9.96, 37.69) | <.001 | 2.44 (2.02, 2.94) | <.001 | 6.06 (2.95, 12.47) | <.001 | 12.39 (6.08, 25.27) | <.001 | 2.04 (1.61, 2.60) | <.001 |
| **cockroach** | 2.82 (1.10, 7.18) | .030 | 6.35 (2.55, 15.81) | <.001 | 2.26 (1.50, 3.39) | <.001 | NE | NA | NE | NA | 2.70 (1.28, 5.69) | .009 |
| **amaranth** | NE | NA | NE | NA | 2.05 (1.22, 3.46) | .007 | NE | NA | NE | NA | 1.52 (0.66, 3.47) | .323 |
| **mold** | 0.52 (0.36, 0.73) | <.001 | 1.15 (0.84, 1.59) | .379 | 2.24 (1.68, 2.97) | <.001 | 0.24 (0.15, 0.39) | <.001 | 0.59 (0.39, 0.89) | .012 | 2.46 (1.54, 3.95) | <.001 |
| **mixed grass** | 1.36 (0.98, 1.87) | .063 | 2.29 (1.67, 3.13) | <.001 | 1.69 (1.38, 2.07) | <.001 | 1.11 (0.71, 1.73) | .656 | 1.78 (1.15, 2.74) | .009 | 1.61 (1.18, 2.19) | .002 |
| **tree pollen** | 2.59 (1.28, 5.23) | .008 | 6.28 (3.18, 12.41) | <.001 | 2.43 (1.77, 3.32) | <.001 | 1.29 (0.47, 3.53) | .620 | 3.62 (1.42, 9.22) | .007 | 2.80 (1.56, 5.05) | <.001 |
| **egg** | 0.27 (0.22, 0.33) | <.001 | 0.25 (0.20, 0.31) | <.001 | 0.90 (0.72, 1.13) | .376 | 0.19 (0.14, 0.25) | <.001 | 0.22 (0.17, 0.28) | <.001 | 1.15 (0.85, 1.54) | .368 |
| **milk** | 0.50 (0.44, 0.57) | <.001 | 0.52 (0.45, 0.60) | <.001 | 1.04 (0.93, 1.17) | .506 | 0.43 (0.36, 0.51) | <.001 | 0.50 (0.42, 0.60) | <.001 | 1.17 (1.00, 1.37) | .051 |
| **shrimp** | 1.24 (0.90, 1.72) | .187 | 1.62 (1.17, 2.23) | .004 | 1.30 (1.04, 1.62) | .020 | 1.17 (0.70, 1.96) | .545 | 1.42 (0.85, 2.37) | .180 | 1.21 (0.84, 1.75) | .304 |
| **beef** | 0.47 (0.36, 0.62) | <.001 | 1.08 (0.84, 1.39) | .550 | 2.29 (1.83, 2.88) | <.001 | 0.36 (0.24, 0.56) | <.001 | 0.92 (0.64, 1.33) | .671 | 2.54 (1.75, 3.69) | <.001 |
| **shellfish** | 1.37 (0.74, 2.54) | .316 | 1.82 (0.98, 3.37) | .056 | 1.33 (0.89, 1.99) | .169 | 0.67 (0.29, 1.53) | .342 | 1.15 (0.53, 2.50) | .729 | 1.72 (0.89, 3.32) | .108 |
| **crab** | 1.36 (0.97, 1.89) | .074 | 1.82 (1.30, 2.54) | <.001 | 1.34 (1.08, 1.67) | .009 | 1.30 (0.78, 2.16) | .316 | 1.52 (0.91, 2.53) | .108 | 1.17 (0.82, 1.66) | .381 |
| **cashew** | 0.64 (0.46, 0.88) | .007 | 0.55 (0.39, 0.77) | <.001 | 0.85 (0.63, 1.16) | .309 | 0.62 (0.38, 0.99) | .045 | 0.52 (0.32, 0.87) | .012 | 0.85 (0.54, 1.34) | .487 |
| **mango** | NE | NA | NE | NA | 3.26 (1.51, 7.05) | .003 | NE | NA | NE | NA | NE | NA |
| **pineapple** | NE | NA | NE | NA | 1.06 (0.32, 3.47) | .928 | NE | NA | NE | NA | NE | NA |

Notes: Values are unadjusted odds ratios (95% confidence intervals) from sex-stratified univariable logistic regression models. Reference phases are indicated in the column headings. NE indicates not estimable because one or both comparison phases had fewer than 5 positive events, separation, or nonconvergence.

Abbreviations: HDM, house dust mite; NA, not applicable; NE, not estimable.

**Supplementary eTable 2a. Odds ratios for allergen sensitization in children aged 0–3 years across pandemic phases**

| **Allergen** | **2020–2022 vs  2018–2019** | ***P* value** | **2023–2024 vs  2018–2019** | ***P* value** | **2023–2024 vs  2020–2022** | ***P* value** |
| --- | --- | --- | --- | --- | --- | --- |
| **HDM** | 0.93 (0.75, 1.14) | .487 | 0.66 (0.52, 0.83) | <.001 | 0.71 (0.59, 0.86) | <.001 |
| **house dust** | NE | NA | NE | NA | NE | NA |
| **mulberry** | NE | NA | NE | NA | NE | NA |
| **cat hair** | 1.20 (0.70, 2.06) | .509 | 1.82 (1.06, 3.14) | .030 | 1.52 (1.01, 2.29) | .045 |
| **dog hair** | 6.84 (2.74, 17.05) | <.001 | 17.70 (7.17, 43.66) | <.001 | 2.59 (1.89, 3.55) | <.001 |
| **cockroach** | NE | NA | NE | NA | 1.50 (0.59, 3.78) | .396 |
| **amaranth** | NE | NA | NE | NA | 2.09 (0.66, 6.62) | .208 |
| **mold** | 0.19 (0.10, 0.38) | <.001 | 0.24 (0.12, 0.50) | <.001 | 1.24 (0.54, 2.89) | .612 |
| **mixed grass** | 1.21 (0.72, 2.05) | .475 | 1.62 (0.94, 2.77) | .081 | 1.33 (0.88, 2.01) | .171 |
| **tree pollen** | NE | NA | NE | NA | 2.89 (1.39, 6.03) | .005 |
| **egg** | 0.26 (0.20, 0.34) | <.001 | 0.25 (0.18, 0.34) | <.001 | 0.97 (0.70, 1.33) | .835 |
| **milk** | 0.48 (0.39, 0.60) | <.001 | 0.52 (0.41, 0.65) | <.001 | 1.08 (0.87, 1.33) | .501 |
| **shrimp** | 1.84 (1.14, 2.97) | .013 | 1.92 (1.16, 3.17) | .011 | 1.04 (0.74, 1.48) | .808 |
| **beef** | 0.46 (0.27, 0.78) | .004 | 0.97 (0.59, 1.58) | .896 | 2.11 (1.30, 3.43) | .003 |
| **shellfish** | 1.81 (0.67, 4.86) | .242 | 1.70 (0.59, 4.84) | .323 | 0.94 (0.45, 1.95) | .868 |
| **crab** | 1.68 (1.08, 2.64) | .023 | 1.85 (1.16, 2.95) | .010 | 1.10 (0.79, 1.53) | .570 |
| **cashew** | 0.71 (0.44, 1.14) | .159 | 0.50 (0.29, 0.88) | .016 | 0.70 (0.42, 1.18) | .183 |
| **mango** | NE | NA | NE | NA | NE | NA |
| **pineapple** | NE | NA | NE | NA | NE | NA |

Notes: Values are unadjusted odds ratios (95% confidence intervals) from age-stratified univariable logistic regression models. Reference phases are indicated in the column headings. NE indicates not estimable because one or both comparison phases had fewer than 5 positive events, separation, or nonconvergence.

Abbreviations: HDM, house dust mite; NA, not applicable; NE, not estimable.

**Supplementary eTable 2b. Odds ratios for allergen sensitization in children aged 4–6 years across pandemic phases**

| **Allergen** | **2020–2022 vs  2018–2019** | ***P* value** | **2023–2024 vs  2018–2019** | ***P* value** | **2023–2024 vs  2020–2022** | ***P* value** |
| --- | --- | --- | --- | --- | --- | --- |
| **HDM** | 1.10 (0.95, 1.27) | .205 | 1.02 (0.87, 1.19) | .838 | 0.92 (0.82, 1.05) | .210 |
| **house dust** | NE | NA | NE | NA | NE | NA |
| **mulberry** | NE | NA | NE | NA | 1.66 (0.68, 4.01) | .263 |
| **cat hair** | 1.31 (0.89, 1.92) | .174 | 2.44 (1.68, 3.55) | <.001 | 1.87 (1.45, 2.42) | <.001 |
| **dog hair** | 7.58 (3.52, 16.30) | <.001 | 15.92 (7.45, 34.02) | <.001 | 2.10 (1.65, 2.68) | <.001 |
| **cockroach** | 1.55 (0.58, 4.20) | .384 | 3.18 (1.22, 8.27) | .018 | 2.04 (1.12, 3.72) | .019 |
| **amaranth** | NE | NA | NE | NA | 1.78 (0.93, 3.43) | .083 |
| **mold** | 0.42 (0.28, 0.62) | <.001 | 0.69 (0.47, 1.00) | .052 | 1.64 (1.12, 2.39) | .010 |
| **mixed grass** | 1.09 (0.74, 1.62) | .661 | 2.24 (1.54, 3.27) | <.001 | 2.05 (1.56, 2.70) | <.001 |
| **tree pollen** | 2.17 (0.90, 5.22) | .085 | 5.37 (2.30, 12.52) | <.001 | 2.48 (1.58, 3.89) | <.001 |
| **egg** | 0.28 (0.22, 0.36) | <.001 | 0.30 (0.23, 0.39) | <.001 | 1.06 (0.81, 1.39) | .671 |
| **milk** | 0.46 (0.39, 0.54) | <.001 | 0.50 (0.42, 0.59) | <.001 | 1.09 (0.94, 1.26) | .247 |
| **shrimp** | 1.13 (0.74, 1.72) | .571 | 1.97 (1.31, 2.97) | .001 | 1.74 (1.29, 2.35) | <.001 |
| **beef** | 0.40 (0.29, 0.56) | <.001 | 0.94 (0.69, 1.27) | .672 | 2.33 (1.73, 3.15) | <.001 |
| **shellfish** | 0.99 (0.47, 2.09) | .979 | 1.52 (0.73, 3.17) | .262 | 1.54 (0.87, 2.70) | .136 |
| **crab** | 1.23 (0.80, 1.87) | .341 | 1.95 (1.29, 2.96) | .002 | 1.59 (1.18, 2.14) | .002 |
| **cashew** | 0.67 (0.46, 0.98) | .040 | 0.63 (0.42, 0.95) | .028 | 0.94 (0.66, 1.36) | .751 |
| **mango** | NE | NA | NE | NA | NE | NA |
| **pineapple** | NE | NA | NE | NA | NE | NA |

Notes: Values are unadjusted odds ratios (95% confidence intervals) from age-stratified univariable logistic regression models. Reference phases are indicated in the column headings. NE indicates not estimable because one or both comparison phases had fewer than 5 positive events, separation, or nonconvergence.

Abbreviations: HDM, house dust mite; NA, not applicable; NE, not estimable.

**Supplementary eTable 2c. Odds ratios for allergen sensitization in children aged 7–18 years across pandemic phases**

| **Allergen** | **2020–2022 vs  2018–2019** | ***P* value** | **2023–2024 vs  2018–2019** | ***P* value** | **2023–2024 vs  2020–2022** | ***P* value** |
| --- | --- | --- | --- | --- | --- | --- |
| **HDM** | 1.05 (0.88, 1.26) | .599 | 0.98 (0.82, 1.18) | .829 | 0.93 (0.83, 1.06) | .270 |
| **house dust** | NE | NA | NE | NA | NE | NA |
| **mulberry** | NE | NA | NE | NA | 1.66 (0.89, 3.11) | .111 |
| **cat hair** | 2.27 (1.49, 3.45) | <.001 | 3.36 (2.22, 5.08) | <.001 | 1.48 (1.22, 1.80) | <.001 |
| **dog hair** | 6.58 (2.67, 16.20) | <.001 | 15.22 (6.25, 37.10) | <.001 | 2.31 (1.83, 2.93) | <.001 |
| **cockroach** | NE | NA | NE | NA | 2.69 (1.60, 4.52) | <.001 |
| **amaranth** | NE | NA | NE | NA | 1.88 (0.93, 3.80) | .080 |
| **mold** | 0.62 (0.35, 1.07) | .085 | 1.86 (1.13, 3.04) | .014 | 3.02 (2.11, 4.33) | <.001 |
| **mixed grass** | 1.53 (0.95, 2.46) | .082 | 2.19 (1.37, 3.48) | .001 | 1.43 (1.11, 1.85) | .006 |
| **tree pollen** | 1.49 (0.66, 3.37) | .335 | 3.32 (1.52, 7.24) | .003 | 2.22 (1.49, 3.32) | <.001 |
| **egg** | 0.18 (0.12, 0.27) | <.001 | 0.23 (0.16, 0.33) | <.001 | 1.26 (0.84, 1.88) | .266 |
| **milk** | 0.54 (0.44, 0.65) | <.001 | 0.58 (0.48, 0.71) | <.001 | 1.09 (0.94, 1.26) | .269 |
| **shrimp** | 0.97 (0.56, 1.67) | .905 | 1.13 (0.66, 1.94) | .662 | 1.17 (0.81, 1.67) | .402 |
| **beef** | 0.47 (0.31, 0.71) | <.001 | 1.11 (0.77, 1.60) | .581 | 2.35 (1.74, 3.16) | <.001 |
| **shellfish** | 0.82 (0.35, 1.96) | .659 | 1.39 (0.61, 3.16) | .429 | 1.69 (0.97, 2.96) | .065 |
| **crab** | 1.51 (0.76, 3.00) | .234 | 2.10 (1.07, 4.09) | .030 | 1.38 (0.96, 1.99) | .080 |
| **cashew** | 0.63 (0.34, 1.20) | .161 | 0.65 (0.34, 1.22) | .179 | 1.02 (0.62, 1.68) | .941 |
| **mango** | NE | NA | NE | NA | 1.60 (0.62, 4.15) | .329 |
| **pineapple** | NE | NA | NE | NA | NE | NA |

Notes: Values are unadjusted odds ratios (95% confidence intervals) from age-stratified univariable logistic regression models. Reference phases are indicated in the column headings. NE indicates not estimable because one or both comparison phases had fewer than 5 positive events, separation, or nonconvergence.

Abbreviations: HDM, house dust mite; NA, not applicable; NE, not estimable.

**Supplementary eTable 3a. Odds ratios for allergen sensitization in spring across pandemic phases**

| **Allergen** | **2020–2022 vs  2018–2019** | ***P* value** | **2023–2024 vs  2018–2019** | ***P* value** | **2023–2024 vs  2020–2022** | ***P* value** |
| --- | --- | --- | --- | --- | --- | --- |
| **HDM** | 0.97 (0.79, 1.20) | .802 | 0.91 (0.74, 1.13) | .390 | 0.94 (0.80, 1.10) | .408 |
| **house dust** | NE | NA | 0.91 (0.32, 2.61) | .866 | NE | NA |
| **mulberry** | NE | NA | NE | NA | 4.45 (1.67, 11.85) | .003 |
| **cat hair** | 1.96 (1.02, 3.77) | .043 | 4.48 (2.40, 8.39) | <.001 | 2.29 (1.66, 3.16) | <.001 |
| **dog hair** | NE | NA | NE | NA | 2.02 (1.45, 2.80) | <.001 |
| **cockroach** | NE | NA | NE | NA | 2.82 (1.10, 7.22) | .031 |
| **amaranth** | NE | NA | NE | NA | NE | NA |
| **mold** | 0.30 (0.16, 0.57) | <.001 | 0.90 (0.54, 1.52) | .702 | 2.99 (1.73, 5.15) | <.001 |
| **mixed grass** | 1.10 (0.63, 1.92) | .750 | 2.30 (1.36, 3.89) | .002 | 2.10 (1.48, 2.97) | <.001 |
| **tree pollen** | NE | NA | NE | NA | 5.89 (2.88, 12.04) | <.001 |
| **egg** | 0.26 (0.18, 0.38) | <.001 | 0.27 (0.19, 0.39) | <.001 | 1.03 (0.71, 1.50) | .875 |
| **milk** | 0.54 (0.43, 0.68) | <.001 | 0.57 (0.46, 0.72) | <.001 | 1.07 (0.89, 1.28) | .499 |
| **shrimp** | 1.64 (0.85, 3.19) | .141 | 1.58 (0.81, 3.08) | .180 | 0.96 (0.64, 1.45) | .847 |
| **beef** | 0.56 (0.30, 1.06) | .074 | 2.07 (1.20, 3.57) | .009 | 3.70 (2.35, 5.82) | <.001 |
| **shellfish** | 0.87 (0.31, 2.49) | .798 | 0.91 (0.32, 2.61) | .866 | 1.05 (0.47, 2.34) | .910 |
| **crab** | 1.57 (0.81, 3.06) | .181 | 1.62 (0.83, 3.15) | .158 | 1.03 (0.68, 1.55) | .904 |
| **cashew** | 0.57 (0.35, 0.95) | .030 | 0.37 (0.21, 0.64) | <.001 | 0.64 (0.39, 1.05) | .078 |
| **mango** | NE | NA | NE | NA | NE | NA |
| **pineapple** | NE | NA | NE | NA | NE | NA |

Notes: Values are unadjusted odds ratios (95% confidence intervals) from season-stratified univariable logistic regression models. Reference phases are indicated in the column headings. NE indicates not estimable because one or both comparison phases had fewer than 5 positive events, separation, or nonconvergence.

Abbreviations: HDM, house dust mite; NA, not applicable; NE, not estimable.

**Supplementary eTable 3b. Odds ratios for allergen sensitization in summer across pandemic phases**

| **Allergen** | **2020–2022 vs  2018–2019** | ***P* value** | **2023–2024 vs  2018–2019** | ***P* value** | **2023–2024 vs  2020–2022** | ***P* value** |
| --- | --- | --- | --- | --- | --- | --- |
| **HDM** | 1.19 (1.00, 1.41) | .053 | 0.96 (0.80, 1.14) | .612 | 0.80 (0.70, 0.92) | .002 |
| **house dust** | NE | NA | 1.21 (0.74, 1.99) | .451 | NE | NA |
| **mulberry** | NE | NA | NE | NA | 1.68 (0.72, 3.94) | .234 |
| **cat hair** | 1.96 (1.29, 2.97) | .001 | 3.12 (2.07, 4.69) | <.001 | 1.59 (1.26, 2.00) | <.001 |
| **dog hair** | NE | NA | NE | NA | 2.11 (1.66, 2.69) | <.001 |
| **cockroach** | 1.14 (0.51, 2.56) | .743 | 2.18 (1.01, 4.68) | .046 | 1.90 (1.14, 3.18) | .014 |
| **amaranth** | NE | NA | NE | NA | 0.94 (0.45, 1.96) | .871 |
| **mold** | 0.31 (0.19, 0.52) | <.001 | 1.13 (0.75, 1.71) | .563 | 3.61 (2.34, 5.56) | <.001 |
| **mixed grass** | 1.85 (1.17, 2.93) | .008 | 2.36 (1.50, 3.72) | <.001 | 1.27 (0.97, 1.67) | .078 |
| **tree pollen** | 2.70 (1.05, 6.91) | .039 | 5.08 (2.03, 12.73) | <.001 | 1.88 (1.23, 2.89) | .004 |
| **egg** | 0.24 (0.18, 0.32) | <.001 | 0.20 (0.15, 0.28) | <.001 | 0.86 (0.63, 1.18) | .347 |
| **milk** | 0.51 (0.42, 0.62) | <.001 | 0.52 (0.43, 0.63) | <.001 | 1.02 (0.86, 1.20) | .842 |
| **shrimp** | 0.98 (0.63, 1.50) | .913 | 1.28 (0.84, 1.96) | .257 | 1.31 (0.96, 1.80) | .093 |
| **beef** | 0.38 (0.24, 0.58) | <.001 | 0.96 (0.66, 1.40) | .849 | 2.57 (1.78, 3.71) | <.001 |
| **shellfish** | 1.53 (0.62, 3.76) | .354 | 1.63 (0.66, 4.03) | .294 | 1.06 (0.59, 1.90) | .837 |
| **crab** | 1.20 (0.76, 1.89) | .445 | 1.66 (1.06, 2.61) | .028 | 1.39 (1.02, 1.89) | .038 |
| **cashew** | 0.57 (0.35, 0.91) | .020 | 0.55 (0.34, 0.91) | .019 | 0.97 (0.63, 1.52) | .906 |
| **mango** | NE | NA | NE | NA | NE | NA |
| **pineapple** | NE | NA | NE | NA | NE | NA |

Notes: Values are unadjusted odds ratios (95% confidence intervals) from season-stratified univariable logistic regression models. Reference phases are indicated in the column headings. NE indicates not estimable because one or both comparison phases had fewer than 5 positive events, separation, or nonconvergence.

Abbreviations: HDM, house dust mite; NA, not applicable; NE, not estimable.

**Supplementary eTable 3c. Odds ratios for allergen sensitization in autumn across pandemic phases**

| **Allergen** | **2020–2022 vs  2018–2019** | ***P* value** | **2023–2024 vs  2018–2019** | ***P* value** | **2023–2024 vs  2020–2022** | ***P* value** |
| --- | --- | --- | --- | --- | --- | --- |
| **HDM** | 1.04 (0.87, 1.24) | .674 | 1.16 (0.96, 1.41) | .116 | 1.12 (0.96, 1.31) | .146 |
| **house dust** | NE | NA | 1.56 (0.93, 2.63) | .091 | NE | NA |
| **mulberry** | NE | NA | NE | NA | NE | NA |
| **cat hair** | 1.36 (0.90, 2.04) | .146 | 2.05 (1.36, 3.09) | <.001 | 1.51 (1.13, 2.03) | .006 |
| **dog hair** | 5.96 (2.59, 13.74) | <.001 | 21.17 (9.32, 48.08) | <.001 | 3.55 (2.68, 4.70) | <.001 |
| **cockroach** | NE | NA | NE | NA | 2.98 (1.53, 5.83) | .001 |
| **amaranth** | NE | NA | NE | NA | 1.79 (0.88, 3.66) | .107 |
| **mold** | 0.47 (0.29, 0.78) | .004 | 0.81 (0.50, 1.32) | .401 | 1.71 (1.07, 2.75) | .025 |
| **mixed grass** | 0.89 (0.57, 1.40) | .618 | 2.09 (1.36, 3.22) | <.001 | 2.35 (1.68, 3.29) | <.001 |
| **tree pollen** | 1.92 (0.79, 4.69) | .151 | 4.66 (1.97, 11.02) | <.001 | 2.43 (1.48, 3.98) | <.001 |
| **egg** | 0.15 (0.11, 0.21) | <.001 | 0.21 (0.15, 0.28) | <.001 | 1.35 (0.94, 1.94) | .102 |
| **milk** | 0.33 (0.27, 0.40) | <.001 | 0.54 (0.45, 0.66) | <.001 | 1.66 (1.39, 1.99) | <.001 |
| **shrimp** | 1.73 (1.05, 2.85) | .032 | 2.24 (1.35, 3.72) | .002 | 1.30 (0.92, 1.81) | .132 |
| **beef** | 0.23 (0.15, 0.34) | <.001 | 0.88 (0.64, 1.22) | .454 | 3.88 (2.64, 5.70) | <.001 |
| **shellfish** | 1.39 (0.59, 3.26) | .452 | 2.15 (0.92, 5.03) | .079 | 1.55 (0.86, 2.79) | .148 |
| **crab** | 1.67 (1.02, 2.72) | .041 | 2.16 (1.31, 3.56) | .002 | 1.30 (0.93, 1.81) | .127 |
| **cashew** | 0.64 (0.39, 1.06) | .081 | 0.64 (0.37, 1.09) | .103 | 0.99 (0.60, 1.62) | .969 |
| **mango** | NE | NA | NE | NA | 1.10 (0.38, 3.18) | .859 |
| **pineapple** | NE | NA | NE | NA | NE | NA |

Notes: Values are unadjusted odds ratios (95% confidence intervals) from season-stratified univariable logistic regression models. Reference phases are indicated in the column headings. NE indicates not estimable because one or both comparison phases had fewer than 5 positive events, separation, or nonconvergence.

Abbreviations: HDM, house dust mite; NA, not applicable; NE, not estimable.

**Supplementary eTable 3d. Odds ratios for allergen sensitization in winter across pandemic phases**

| **Allergen** | **2020–2022 vs  2018–2019** | ***P* value** | **2023–2024 vs  2018–2019** | ***P* value** | **2023–2024 vs  2020–2022** | ***P* value** |
| --- | --- | --- | --- | --- | --- | --- |
| **HDM** | 1.63 (1.22, 2.16) | <.001 | 1.69 (1.25, 2.26) | <.001 | 1.04 (0.84, 1.27) | .735 |
| **house dust** | NE | NA | NE | NA | NE | NA |
| **mulberry** | NE | NA | NE | NA | NE | NA |
| **cat hair** | 1.97 (0.99, 3.91) | .053 | 3.04 (1.53, 6.00) | .001 | 1.54 (1.06, 2.24) | .024 |
| **dog hair** | 3.25 (1.28, 8.26) | .013 | 4.46 (1.76, 11.34) | .002 | 1.37 (0.90, 2.09) | .141 |
| **cockroach** | NE | NA | NE | NA | NE | NA |
| **amaranth** | NE | NA | NE | NA | NE | NA |
| **mold** | 0.60 (0.31, 1.17) | .132 | 0.51 (0.25, 1.07) | .074 | 0.86 (0.46, 1.62) | .639 |
| **mixed grass** | 1.38 (0.63, 3.02) | .423 | 1.27 (0.56, 2.89) | .564 | 0.92 (0.53, 1.60) | .779 |
| **tree pollen** | NE | NA | NE | NA | 0.96 (0.30, 3.04) | .948 |
| **egg** | 0.57 (0.36, 0.90) | .016 | 0.45 (0.27, 0.74) | .002 | 0.78 (0.50, 1.22) | .279 |
| **milk** | 0.76 (0.58, 1.01) | .060 | 0.44 (0.32, 0.61) | <.001 | 0.58 (0.45, 0.75) | <.001 |
| **shrimp** | 0.68 (0.30, 1.52) | .344 | 1.40 (0.65, 3.00) | .394 | 2.06 (1.13, 3.78) | .019 |
| **beef** | 1.39 (0.78, 2.49) | .266 | 1.04 (0.56, 1.95) | .891 | 0.75 (0.49, 1.16) | .195 |
| **shellfish** | NE | NA | NE | NA | NE | NA |
| **crab** | 0.91 (0.42, 1.97) | .807 | 1.45 (0.68, 3.11) | .341 | 1.60 (0.92, 2.78) | .098 |
| **cashew** | 1.02 (0.46, 2.30) | .953 | 0.80 (0.33, 1.93) | .620 | 0.78 (0.40, 1.52) | .469 |
| **mango** | NE | NA | NE | NA | NE | NA |
| **pineapple** | NE | NA | NE | NA | NE | NA |

Notes: Values are unadjusted odds ratios (95% confidence intervals) from season-stratified univariable logistic regression models. Reference phases are indicated in the column headings. NE indicates not estimable because one or both comparison phases had fewer than 5 positive events, separation, or nonconvergence.

Abbreviations: HDM, house dust mite; NA, not applicable; NE, not estimable.

**Supplementary eTable 4. Univariable odds ratios for allergen sensitization across pandemic phases**

| **Allergen** | **2020–2022 vs 2018–2019** | ***P* value** | **2023–2024 vs 2018–2019** | ***P* value** | **2023–2024 vs 2020–2022** | ***P* value** |
| --- | --- | --- | --- | --- | --- | --- |
| **HDM** | 1.12 (1.01, 1.23) | .025 | 1.06 (0.96, 1.18) | .243 | 0.95 (0.88, 1.03) | .191 |
| **house dust** | 0.06 (0.03, 0.13) | <.001 | 1.41 (1.01, 1.96) | .043 | 22.28 (10.92, 45.47) | <.001 |
| **mulberry** | 2.00 (0.84, 4.81) | .119 | 3.27 (1.39, 7.71) | .007 | 1.63 (1.02, 2.60) | .041 |
| **cat hair** | 1.72 (1.34, 2.20) | <.001 | 2.90 (2.27, 3.69) | <.001 | 1.69 (1.46, 1.95) | <.001 |
| **dog hair** | 7.05 (4.31, 11.52) | <.001 | 16.08 (9.89, 26.14) | <.001 | 2.28 (1.97, 2.65) | <.001 |
| **cockroach** | 2.03 (0.99, 4.15) | .052 | 4.72 (2.37, 9.38) | <.001 | 2.32 (1.63, 3.32) | <.001 |
| **amaranth** | 3.21 (1.13, 9.06) | .028 | 5.99 (2.16, 16.62) | <.001 | 1.87 (1.20, 2.91) | .005 |
| **mold** | 0.40 (0.30, 0.53) | <.001 | 0.91 (0.71, 1.17) | .448 | 2.27 (1.78, 2.89) | <.001 |
| **mixed grass** | 1.27 (0.98, 1.65) | .069 | 2.10 (1.63, 2.71) | <.001 | 1.65 (1.39, 1.95) | <.001 |
| **tree pollen** | 2.14 (1.21, 3.80) | .009 | 5.30 (3.06, 9.18) | <.001 | 2.47 (1.87, 3.26) | <.001 |
| **egg** | 0.24 (0.20, 0.28) | <.001 | 0.23 (0.20, 0.28) | <.001 | 0.99 (0.82, 1.18) | .873 |
| **milk** | 0.48 (0.43, 0.53) | <.001 | 0.52 (0.46, 0.58) | <.001 | 1.08 (0.98, 1.18) | .116 |
| **shrimp** | 1.23 (0.94, 1.62) | .137 | 1.55 (1.18, 2.04) | .002 | 1.26 (1.04, 1.53) | .016 |
| **beef** | 0.44 (0.35, 0.55) | <.001 | 1.03 (0.83, 1.26) | .806 | 2.34 (1.92, 2.83) | <.001 |
| **shellfish** | 1.09 (0.67, 1.78) | .725 | 1.54 (0.95, 2.49) | .078 | 1.41 (1.00, 1.99) | .048 |
| **crab** | 1.34 (1.02, 1.78) | .037 | 1.72 (1.30, 2.27) | <.001 | 1.28 (1.06, 1.54) | .010 |
| **cashew** | 0.64 (0.49, 0.83) | <.001 | 0.54 (0.40, 0.72) | <.001 | 0.85 (0.66, 1.09) | .202 |
| **mango** | 1.94 (0.58, 9.92) | .306 | 5.06 (1.66, 24.93) | .002 | 2.61 (1.36, 5.30) | .004 |
| **pineapple** | 0.83 (0.25, 3.42) | .775 | 1.02 (0.30, 4.20) | .977 | 1.23 (0.44, 3.46) | .691 |

Notes: Values are odds ratios (95% confidence intervals) from univariable logistic regression models. For mango and pineapple, Firth-penalized univariable logistic regression was used because of sparse events, consistent with the primary adjusted models. Reference phases are indicated in the column headings.

Abbreviations: HDM, house dust mite.
